# Supplementary material for: Ophthalmic and Genetic Features of Bardet Biedl Syndrome in a German Cohort
Source: MDPI journal article supplement (doi:10.3390/genes13071218), 2022-07-08
Supplement: s1 [file s1]

| Patient ID        | Age at Diagnostic Exam (yr) | Visual field (Hx)                                                                                    | Visual acuity OD | Visual acuity OS | Spherical Equivalent OD | Spherical Equivalent OS | ERG                         | Flash VEP                                  | AO performed | OCT/RL                                                                                             | AI (ganglion cell) hyperfucrescence (muV) | Fundus RL                                             | First symptoms                                                    | Age of onset | Hypertension   | Strabismus      | PSS                                   | Comment                           |    |
|-------------------|-----------------------------|------------------------------------------------------------------------------------------------------|------------------|------------------|-------------------------|-------------------------|-----------------------------|--------------------------------------------|--------------|----------------------------------------------------------------------------------------------------|-------------------------------------------|-------------------------------------------------------|-------------------------------------------------------------------|--------------|----------------|-----------------|---------------------------------------|-----------------------------------|----|
| 0001: 15 patients |                             |                                                                                                      |                  |                  |                         |                         |                             |                                            |              |                                                                                                    |                                           |                                                       |                                                                   |              |                |                 |                                       |                                   |    |
| 0007b             | 39                          | not recordable                                                                                       | 0.03             | 0.04             | -1.5                    | -1.75                   | extinguished                | -                                          | -            | loss of photoreceptor layer, LHM wrinkling                                                         | yes                                       | RP                                                    | right blindness                                                   | childhood    | no             | no              | total color discrimination impairment | RL, ICL at age of 39              |    |
| 0004b             | 16                          | RL, ICL: concentric constriction 8-10°                                                               | 0.03             | 0.03             | -                       | -                       | extinguished                | -                                          | -            | loss of photoreceptor layer, deposits adjacent to Bruch's membrane, foveal atrophy                 | yes                                       | RP                                                    | right blindness, light photophobia                                | childhood    | no             | no              | total color discrimination impairment | at age of 15 (unilateral)         |    |
| 0003b             | 34                          | RL, ICL: 3-4° at age of 34                                                                           | 0.1              | 0.08             | -                       | -                       | extinguished                | good amplitude                             | -            | loss of photoreceptor layer, deposits adjacent to Bruch's membrane, LHM wrinkling                  | yes                                       | RP                                                    | right blindness                                                   | 20 yr        | no             | no              | total color discrimination impairment | RL, ICL at age of 34              |    |
| 0007b             | 46                          | not recordable                                                                                       | HM               | HM               | -                       | -                       | extinguished                | severe reduction in amplitude              | -            | loss of photoreceptor layer, deposits adjacent to Bruch's membrane, LHM wrinkling                  | yes                                       | RP                                                    | right blindness                                                   | childhood    | no             | yes, LD CP      | total color discrimination impairment | RL, ICL at age of 46              |    |
| 0005b             | 33                          | RL, ICL: 2°                                                                                          | 0.2              | 0.25             | -1.75                   | -2                      | extinguished                | good amplitude                             | yes          | loss of photoreceptor layer, foveal atrophy                                                        | yes                                       | RP                                                    | right blindness                                                   | childhood    | no             | no              | total color discrimination impairment | RL, ICL at age of 33              |    |
| 0005b-0           | 36                          | RL, ICL: 3°                                                                                          | 0.25             | 0.05             | -0.25                   | -0.5                    | extinguished                | pattern VEP: severe reduction in amplitude | yes          | loss of photoreceptor layer, deposits adjacent to Bruch's membrane, LHM wrinkling                  | yes                                       | RP                                                    | right blindness                                                   | childhood    | no             | yes, LD CP      | total color discrimination impairment | RL, ICL at age 36 (unilateral)    |    |
| 0006b             | 34                          | not recordable                                                                                       | 0.03             | 0.03             | 2                       | 1.5                     | extinguished                | severe reduction in amplitude              | -            | loss of photoreceptor layer, deposits adjacent to Bruch's membrane, LHM wrinkling                  | yes                                       | cone-rod dystrophy                                    | light photophobia, right blindness                                | 6 yr         | no             | no              | total color discrimination impairment | at age of 34 (unilateral)         |    |
| 0001b             | 43                          | not recordable                                                                                       | HM               | HM               | -                       | -                       | extinguished                | severe reduction in amplitude              | -            | loss of photoreceptor layer, foveal atrophy, LHM wrinkling                                         | yes                                       | RP                                                    | right blindness                                                   | 30 yr        | yes            | no              | total color discrimination impairment | RL, ICL at age of 43 (unilateral) |    |
| 0000b             | 14                          | RL, ICL: 5-7°                                                                                        | 0.05             | 0.05             | 0.5                     | 0.5                     | extinguished                | good amplitude                             | -            | loss of photoreceptor layer, severe macular atrophy, LHM wrinkling (epithelial membrane)           | yes                                       | RP                                                    | right blindness                                                   | childhood    | no             | no              | total color discrimination impairment | RL, ICL at age of 14              |    |
| 0007b-0           | 56                          | not recordable                                                                                       | HM               | HM               | -                       | -                       | extinguished                | good amplitude                             | -            | loss of photoreceptor layer, foveal atrophy, LHM wrinkling (epithelial membrane)                   | yes                                       | RP                                                    | light photophobia                                                 | 14 yr        | yes            | yes             | total color discrimination impairment | RL, ICL at age of 56              |    |
| 0007b             | 15                          | RL, ICL: 1.5-7°                                                                                      | 0.2              | 0.25             | -7                      | -6.75                   | extinguished                | good amplitude                             | -            | loss of photoreceptor layer, foveal atrophy, LHM wrinkling                                         | no                                        | RP                                                    | right blindness                                                   | 4 yr         | no             | no              | Normal                                | no                                |    |
| 0004b-0           | 18                          | Perimetry 10°, 10° nasal, superior, 10° temporal and 60° inferior; good function (no peripheral)     | 0.01             | 0.05             | -4.75                   | -3.5                    | extinguished                | good amplitude                             | -            | persistence of the photoreceptor layer cells outside the fovea                                     | yes                                       | cone dystrophy (age 18)                               | light photophobia                                                 | 7 yr         | no             | no              | Normal                                | no                                |    |
| 0007b-0           | 30                          | not recordable                                                                                       | 0.02             | 0.025            | 4.5                     | 3.5                     | extinguished                | good amplitude                             | -            | loss of photoreceptor layer, LHM wrinkling                                                         | yes                                       | RP                                                    | right blindness                                                   | childhood    | yes            | no              | not possible                          | at age of 30                      |    |
| 0004b             | 13                          | RL, ICL: 6-8°                                                                                        | 0.05             | 0.05             | 1                       | 1                       | extinguished                | reduction in amplitude                     | -            | loss of photoreceptor layer, foveal atrophy, LHM wrinkling                                         | yes                                       | rod-cone dystrophy                                    | right blindness, nyctalopia                                       | 1 yr         | yes            | no              | total color discrimination impairment | RL, ICL at age of 13              |    |
| 0007b             | 11                          | not recordable                                                                                       | 0.25             | 0.25             | 4                       | 3.5                     | extinguished                | good amplitude                             | -            | loss of layer of photoreceptor cells outside the fovea, LHM wrinkling                              | no                                        | cone-rod dystrophy                                    | right photophobia, right blindness                                | childhood    | no             | no              | not possible                          | no                                |    |
| 0002: 3 patients  |                             |                                                                                                      |                  |                  |                         |                         |                             |                                            |              |                                                                                                    |                                           |                                                       |                                                                   |              |                |                 |                                       |                                   |    |
| 0003b             | 21                          | not recordable                                                                                       | 0.125            | 0.1              | -3                      | -3                      | extinguished                | -                                          | -            | loss of photoreceptor layer, foveal atrophy, internal limiting membrane wrinkling                  | no                                        | RP                                                    | right blindness, light photophobia                                | childhood    | yes            | childhood       | total color discrimination impairment | RL, ICL at age of 21              |    |
| 0005b             | 25                          | RL, ICL: 5-7°                                                                                        | 0.1              | 0.2              | -3.25                   | -3.5                    | extinguished                | -                                          | -            | loss of photoreceptor layer outside the fovea, internal limiting membrane wrinkling                | yes, built's eye                          | cone-rod dystrophy                                    | light photophobia, right blindness                                | 8 yr         | no             | yes             | total color discrimination impairment | RL, ICL at age of 25              |    |
| 0007b-0           | 8                           | not recordable                                                                                       | 0.4              | 0.5              | 0.4                     | 0.5                     | extinguished                | -                                          | -            | loss of photoreceptor layer outside the fovea, internal limiting membrane wrinkling                | no                                        | cone-rod dystrophy                                    | light photophobia                                                 | 5 yr         | no             | no              | not done                              | no                                |    |
| 0003: 3 patients  |                             |                                                                                                      |                  |                  |                         |                         |                             |                                            |              |                                                                                                    |                                           |                                                       |                                                                   |              |                |                 |                                       |                                   |    |
| 0004b-0           | 23                          | RL, ICL: 30°                                                                                         | 0.125            | 0.125            | -4.5                    | -4                      | remaining scotopic response | -                                          | -            | loss of photoreceptors in fovea with good layer of photoreceptors towards periphery                | yes                                       | cone dystrophy                                        | light photophobia                                                 | childhood    | no             | no              | total color discrimination impairment | no                                |    |
| 0004b-0           | 13                          | central scotoma ex                                                                                   | 0.25             | 0.25             | -6.75                   | -7.25                   | remaining scotopic response | -                                          | -            | loss of photoreceptor layer towards periphery                                                      | yes                                       | cone-rod dystrophy                                    | visual acuity impairment, light photophobia                       | childhood    | no             | no              | total color discrimination impairment | no                                |    |
| 0006b             | 17                          | not recordable                                                                                       | 0.03             | 0.05             | -10.5                   | -10.5                   | extinguished                | good amplitude                             | -            | LD: loss of photoreceptor layer outside the fovea, internal limiting membrane wrinkling            | no                                        | cone-rod dystrophy                                    | right blindness, nyctalopia                                       | 1 yr         | yes            | yes, RD         | total color discrimination impairment | at age of 17 yrs (bilateral)      |    |
| 0004: 3 patients  |                             |                                                                                                      |                  |                  |                         |                         |                             |                                            |              |                                                                                                    |                                           |                                                       |                                                                   |              |                |                 |                                       |                                   |    |
| 0003b             | 23                          | not recordable                                                                                       | HM               | HM               | -3                      | -3.25                   | extinguished                | -                                          | -            | loss of photoreceptor layer, foveal atrophy, internal limiting membrane wrinkling                  | yes                                       | RP                                                    | right blindness                                                   | childhood    | yes            | yes             | total color discrimination impairment | no                                |    |
| 0004b-0           | 30                          | not recordable                                                                                       | 0.03             | 0.05             | -8.5                    | -9                      | extinguished                | reduction in amplitude                     | -            | loss of photoreceptor layer, foveal atrophy, internal limiting membrane wrinkling                  | yes, built's eye                          | RP                                                    | right blindness                                                   | childhood    | yes            | no              | total color discrimination impairment | RL, ICL at age of 29 (bilateral)  |    |
| 0005b             | 22                          | not recordable                                                                                       | 0.006            | 0.06             | 10                      | 10                      | extinguished                | -                                          | -            | LD: loss of photoreceptor layer, foveal atrophy                                                    | yes                                       | RP                                                    | right blindness, nyctalopia                                       | 1 yr         | yes            | childhood       | total color discrimination impairment | at age of 22                      |    |
| 0005: 3 patients  |                             |                                                                                                      |                  |                  |                         |                         |                             |                                            |              |                                                                                                    |                                           |                                                       |                                                                   |              |                |                 |                                       |                                   |    |
| 0006b-0           | 20                          | RA about 4°, LA about 3°, peripheral temporal scotoma remaining islands at age of 20                 | 0.16             | 0.16             | -0.75                   | -0.75                   | extinguished                | Pattern VEP: severe reduction in amplitude | yes          | loss of photoreceptor cell layer outside the fovea, internal limiting membrane wrinkling           | yes                                       | rod-cone dystrophy                                    | right blindness                                                   | childhood    | yes            | yes             | total color discrimination impairment | at age of 20 (bilateral)          |    |
| 0006b-0           | 7                           | not recordable                                                                                       | 0.5              | 0.1              | -3.5                    | -1                      | NP                          | -                                          | -            | loss of photoreceptor cell layer outside the fovea, internal limiting membrane wrinkling           | no                                        | rod-cone dystrophy                                    | visual acuity impairment at age 1 yr                              | no           | no             | not possible    | no                                    |                                   |    |
| 0004b             | 37                          | not recordable                                                                                       | NLP              | NLP              | -                       | -                       | extinguished                | -                                          | -            | RL: severe loss of photoreceptor layer                                                             | yes at age 37 yr                          | RP                                                    | right blindness                                                   | 10 yr        | no             | no              | not possible                          | no                                |    |
| 0006: 1 patient   |                             |                                                                                                      |                  |                  |                         |                         |                             |                                            |              |                                                                                                    |                                           |                                                       |                                                                   |              |                |                 |                                       |                                   |    |
| 0003b             | 48                          | not recordable                                                                                       | 0.05             | NLP              | -8.5                    | (profound)              | extinguished                | -                                          | -            | severe loss of photoreceptor layer in RE                                                           | no                                        | RP                                                    | light photophobia, right blindness                                | childhood    | yes            | LD: enucleation | not possible                          | RL, ICL at age of 48              |    |
| 0007: 3 patients  |                             |                                                                                                      |                  |                  |                         |                         |                             |                                            |              |                                                                                                    |                                           |                                                       |                                                                   |              |                |                 |                                       |                                   |    |
| 0007b             | 20                          | RL, ICL: 30°                                                                                         | 0.07             | 0.05             | 1.5                     | 1                       | extinguished                | good amplitude                             | -            | loss of photoreceptor layer outside the fovea                                                      | yes                                       | RP                                                    | right blindness, light photophobia                                | childhood    | no             | no              | total color discrimination impairment | at age of 20                      |    |
| 0002b             | 17                          | not recordable                                                                                       | 0.038            | 0.02             | -4.25                   | -5                      | extinguished                | Pattern VEP: good amplitude                | -            | loss of photoreceptor layer, foveal atrophy, internal limiting membrane wrinkling                  | yes, built's eye                          | RP                                                    | right blindness, light photophobia                                | childhood    | no             | no              | normal                                | no                                |    |
| 0006b             | 17                          | not recordable                                                                                       | 0.04             | 0.06             | 3                       | 2.5                     | extinguished                | good amplitude                             | -            | loss of photoreceptor layer, foveal atrophy, internal limiting membrane wrinkling                  | yes, built's eye                          | RP                                                    | light photophobia                                                 | 12 yr        | yes            | yes             | total color discrimination impairment | at age of 17 (bilateral)          |    |
| 0008: 1 patient   |                             |                                                                                                      |                  |                  |                         |                         |                             |                                            |              |                                                                                                    |                                           |                                                       |                                                                   |              |                |                 |                                       |                                   |    |
| 0007b             | 17                          | RL, ICL: 20-25°                                                                                      | 0.125            | 0.05             | 3                       | 3                       | extinguished                | -                                          | yes          | loss of photoreceptor layer, foveal atrophy, internal limiting membrane wrinkling                  | yes                                       | RP                                                    | right blindness                                                   | 6 yr         | yes            | yes, LD         | not possible                          | RL, ICL at age of 17              |    |
| 0009: 5 patients  |                             |                                                                                                      |                  |                  |                         |                         |                             |                                            |              |                                                                                                    |                                           |                                                       |                                                                   |              |                |                 |                                       |                                   |    |
| 0004b-0           | 43                          | not recordable                                                                                       | LS               | LS               | -0.25                   | -0.5                    | extinguished                | severe reduction in amplitude              | -            | LD: loss of photoreceptor layer, foveal atrophy, internal limiting membrane wrinkling              | no                                        | rp                                                    | right blindness                                                   | childhood    | yes            | yes, RA         | total color discrimination impairment | RL, Hemianopia                    |    |
| 0004b-0           | 30                          | not recordable                                                                                       | HM               | CP               | 1.25                    | 2                       | extinguished                | -                                          | -            | loss of photoreceptor layer, foveal atrophy                                                        | yes, built's eye                          | RP                                                    | right blindness, light photophobia                                | childhood    | yes            | yes             | total color discrimination impairment | at age of 30                      |    |
| 0004b-0           | 20                          | RL, ICL: peripheral remaining islands                                                                | 0.25             | 0.25             | 1                       | 1.25                    | extinguished                | -                                          | -            | loss of photoreceptor layer, foveal atrophy                                                        | yes, built's eye                          | rod-cone dystrophy                                    | right blindness                                                   | childhood    | yes            | yes             | total color discrimination impairment | RL, ICL at age of 16              |    |
| LC470             | 39                          | not recordable                                                                                       | LS               | LS               | -1.5                    | -1                      | NP                          | -                                          | -            | loss of photoreceptor layer, foveal atrophy                                                        | yes, built's eye                          | RP                                                    | right blindness, visual acuity impairment at age 10 yr            | childhood    | yes            | yes             | total color discrimination impairment | no                                |    |
| 0007b             | 6                           | not recordable                                                                                       | 0.63             | -0.3             | -3.25                   | -3.25                   | extinguished                | -                                          | -            | NP                                                                                                 | no                                        | cone-rod dystrophy                                    | right blindness at age 1 yr                                       | childhood    | no             | no              | total color discrimination impairment | no                                |    |
| 0010: 20 patients |                             |                                                                                                      |                  |                  |                         |                         |                             |                                            |              |                                                                                                    |                                           |                                                       |                                                                   |              |                |                 |                                       |                                   |    |
| 0001b             | 11                          | RE 3-9°, LE 7-10°                                                                                    | 0.25             | 0.2              | -4                      | -4                      | extinguished                | pattern VEP: severe reduction in amplitude | -            | loss of photoreceptor layer, foveal atrophy, LHM wrinkling                                         | yes                                       | RP                                                    | right blindness                                                   | 2 yr         | until age of 5 | yes             | total color discrimination impairment | no                                |    |
| 0004b             | 38                          | not recordable                                                                                       | LP               | LP               | -                       | -                       | extinguished                | -                                          | -            | loss of photoreceptor layer, foveal atrophy, LHM wrinkling                                         | yes                                       | RP                                                    | right blindness, light photophobia                                | childhood    | yes            | yes             | total color discrimination impairment | RL, ICL at age of 38              |    |
| 0004b             | 34                          | poor fixation                                                                                        | 0.06             | 0.06             | -2                      | -2.25                   | extinguished                | -                                          | -            | loss of photoreceptor layer, foveal atrophy, LHM wrinkling                                         | yes                                       | RP                                                    | right blindness                                                   | 10 yr        | yes            | no              | total color discrimination impairment | at age of 34                      |    |
| 0001b             | 37                          | not recordable                                                                                       | 0.02             | 0.02             | -9                      | -1.25                   | extinguished                | good amplitude                             | -            | loss of photoreceptor layer, foveal atrophy                                                        | no                                        | rod-cone dystrophy                                    | right blindness                                                   | childhood    | yes            | no              | total color discrimination impairment | at age of 37 (bilateral)          |    |
| 0003b             | 23                          | not recordable                                                                                       | 0.02             | LS               | -3.25                   | -3.5                    | extinguished                | good amplitude                             | -            | loss of photoreceptor layer, foveal atrophy, LHM wrinkling                                         | yes                                       | RP                                                    | right blindness, light photophobia                                | childhood    | yes            | no              | total color discrimination impairment | at age of 23                      |    |
| 0004b             | 5                           | not recordable                                                                                       | 0.4              | 0.2              | 3.25                    | 4.75                    | extinguished                | -                                          | -            | loss of photoreceptor layer outside the fovea                                                      | yes                                       | cone-rod dystrophy                                    | visual acuity impairment at age 1 yr, nyctalopia since first year | no           | no             | yes             | total color discrimination impairment | no                                |    |
| 0003b             | 28                          | no fixation, nyctalopia, not recordable                                                              | HM               | 0.1              | -5                      | -3.5                    | extinguished                | good amplitude                             | -            | loss of photoreceptor layer, foveal atrophy, LHM wrinkling                                         | yes                                       | RP                                                    | right blindness                                                   | childhood    | yes            | no              | total color discrimination impairment | RL, ICL at age of 28              |    |
| 0005b             | 13                          | RL, ICL: 1.5-10°                                                                                     | 0.3              | 0.3              | -2.5                    | -2.5                    | extinguished                | -                                          | yes          | loss of photoreceptor layer outside the fovea, LHM wrinkling                                       | no                                        | RP                                                    | strabismus at age 1 yr                                            | childhood    | no             | yes, RD         | not possible                          | no                                |    |
| 0007b             | 7                           | not recordable                                                                                       | 0.25             | 0.25             | -2.25                   | -4.75                   | extinguished                | -                                          | yes          | loss of photoreceptor layer outside the fovea, LHM wrinkling                                       | yes                                       | cone-rod dystrophy                                    | right blindness                                                   | childhood    | no             | no              | total color discrimination impairment | no                                |    |
| 0002b             | 6                           | RL, ICL: 3-2°                                                                                        | 0.05             | HM               | -3.25                   | -3.25                   | extinguished                | -                                          | -            | NP                                                                                                 | yes, at age 25 yr                         | RP                                                    | right blindness                                                   | childhood    | yes            | no              | total color discrimination impairment | no                                |    |
| 0007b             | 24                          | RL, ICL: concentric constriction 10° Crow                                                            | 0.125            | 0.125            | -4.5                    | -5.5                    | extinguished                | -                                          | -            | loss of photoreceptor layer, foveal atrophy, LHM wrinkling                                         | yes                                       | cone-rod dystrophy                                    | right blindness                                                   | 6 yr         | no             | no              | total color discrimination impairment | at age of 24                      |    |
| 0002b             | 12                          | severely asymmetric binocular hemianopia, RL: concentric constriction 10°, central 40°, inferior 40° | 0.2              | 0.05             | 1                       | 0.5                     | extinguished                | reduction in amplitude                     | -            | loss of photoreceptor layer, foveal atrophy, LHM wrinkling                                         | yes                                       | rod-cone dystrophy                                    | right blindness, light photophobia                                | 3 yr         | yes            | no              | total color discrimination impairment | no                                |    |
| 0007b             | 41                          | not recordable                                                                                       | amaurotic        | amaurotic        | -                       | -                       | extinguished                | -                                          | -            | loss of photoreceptor layer, foveal atrophy, LHM wrinkling                                         | no                                        | RP                                                    | light photophobia, right blindness                                | childhood    | no             | no              | not done                              | RL, ICL at age of 41              |    |
| 14095             | 41                          | not recordable                                                                                       | LP               | HM               | -                       | -                       | extinguished                | reduction in amplitude                     | -            | severe atrophy of photoreceptor layer                                                              | no                                        | RP                                                    | right blindness                                                   | childhood    | yes            | yes             | total color discrimination impairment | at age of 41 (bilateral)          |    |
| 0005b             | 31                          | not recordable                                                                                       | HM               | HM               | 1.5                     | 2.25                    | extinguished                | -                                          | -            | loss of photoreceptor layer, foveal atrophy, LHM wrinkling                                         | yes                                       | RP                                                    | right blindness, light photophobia                                | childhood    | yes            | no              | perimetry was defect                  | at age of 31 (bilateral)          |    |
| 0007b             | 9                           | not recordable                                                                                       | 0.02             | 0.1              | -0.5                    | -0.5                    | extinguished                | -                                          | -            | loss of photoreceptor layer, foveal atrophy, LHM wrinkling                                         | no                                        | RP                                                    | right blindness, light photophobia                                | childhood    | 2 yr           | yes             | no                                    | not possible                      | no |
| 0006b             | 9                           | not recordable                                                                                       | 0.125            | 0.1              | 2                       | 2                       | extinguished                | -                                          | -            | loss of photoreceptor layer, foveal atrophy, LHM wrinkling                                         | no                                        | cone-rod dystrophy                                    | right blindness, strabismus at age 2 yr                           | 2 yr         | yes            | yes, LD         | total color discrimination impairment | no                                |    |
| 0004b             | 36                          | not recordable                                                                                       | LS, LS           | LS, LS           | -5                      | -5.5                    | extinguished                | -                                          | -            | loss of photoreceptor layer, foveal atrophy, LHM wrinkling                                         | no                                        | RP                                                    | right blindness                                                   | childhood    | yes            | no              | total color discrimination impairment | RL, ICL at age of 36              |    |
| 0007b             | 19                          | not recordable                                                                                       | 0.02             | 0.06             | -2.5                    | -2                      | extinguished                | good amplitude                             | -            | LD: loss of photoreceptor layer, foveal atrophy, LHM wrinkling                                     | yes                                       | RP                                                    | right blindness                                                   | childhood    | yes            | no              | total color discrimination impairment | no                                |    |
| IC2768            | 29                          | RL, ICL: concentric constriction with beginning of ring systems, central scotoma                     | 0.05             | 0.05             | 0.5                     | 0.5                     | remaining scotopic response | -                                          | -            | foveal atrophy with persistence of the layer of photoreceptor cells outside the fovea              | yes                                       | cone-rod dystrophy                                    | light photophobia                                                 | 14 yr        | no             | no              | total color discrimination impairment | no                                |    |
| 0012: 3 patients  |                             |                                                                                                      |                  |                  |                         |                         |                             |                                            |              |                                                                                                    |                                           |                                                       |                                                                   |              |                |                 |                                       |                                   |    |
| 0009b             | 21                          | relative central scotoma                                                                             | 0.8              | 0.63             | 0.8                     | 0.63                    | scotopic response           | -                                          | -            | An intact photoreceptors layer except for a small loss in fovea area (cone dystrophy)              | yes                                       | cone dystrophy                                        | light photophobia, right blindness                                | 17 yr        | no             | no              | normal                                | no                                |    |
| 0005b             | 16                          | Perimetry 10°, 10° nasal, superior, 10° temporal and 60° inferior (good function in periphery)       | 0.4              | 0.3              | -5                      | -4                      | scotopic response           | -                                          | -            | little loss of photoreceptors in fovea with good layer of photoreceptors outside towards periphery | yes                                       | cone dystrophy (age 16), pericapsular myopia (age 16) | visual acuity impairment                                          | 11 yr        | no             | no              | normal                                | no                                |    |
| 0004b             | 26                          | not recordable                                                                                       | HM               | LS               | -3.5                    | -3.5                    | extinguished                | -                                          | -            | severe loss of the layer of photoreceptors                                                         | yes                                       | rod-cone dystrophy                                    | right blindness                                                   | childhood    | yes            | yes             | total color discrimination impairment | RL, ICL at age of 26              |    |
| 0016: 1 patient   |                             |                                                                                                      |                  |                  |                         |                         |                             |                                            |              |                                                                                                    |                                           |                                                       |                                                                   |              |                |                 |                                       |                                   |    |
| 0009b             | 42                          | RL, ICL: 2-7° with large remaining islands nasal inferior                                            | 0.12             | 0.4              | 0.5                     | 0.5                     | extinguished                | -                                          | -            | loss of photoreceptor layer outside the fovea, LHM wrinkling                                       | no                                        | RP                                                    | right blindness                                                   | 16 yr        | no             | no              | total color discrimination impairment | RL, ICL at age of 42              |    |
