# Supplementary material for: Ophthalmic and Genetic Features of Bardet Biedl Syndrome in a German Cohort
Source: MDPI journal article supplement (doi:10.3390/genes13071218), 2022-07-08
Supplement: s1 [file s1]

**Supplementary Table S1: Genotypes of BBS patients in this study**

| Patient ID                | Sex | Variant 1                                                                         | Variant 2                                                                         | Additional heterozygous variants                                                                          | Segregation |
|---------------------------|-----|-----------------------------------------------------------------------------------|-----------------------------------------------------------------------------------|-----------------------------------------------------------------------------------------------------------|-------------|
| <b>BBS1: 15 patients</b>  |     |                                                                                   |                                                                                   |                                                                                                           |             |
| BBS79                     | m   | <i>BBS1</i> c.1169T>G;p.(M390R)                                                   | <i>BBS1</i> c.1169T>G;p.(M390R)                                                   | <i>MKKS</i> (BBS6) c.463C>T;p.(R155C)                                                                     | -           |
| BBS49                     | f   | <i>BBS1</i> c.1169T>G;p.(M390R)                                                   | <i>BBS1</i> c.1169T>G;p.(M390R)                                                   | <i>ABCA4</i> c.5338>G;p.(P1780A)                                                                          | -           |
| BBS30                     | f   | <i>BBS1</i> c.1169T>G;p.(M390R)                                                   | <i>BBS1</i> c.1169T>G;p.(M390R)                                                   |                                                                                                           | yes         |
| SRP17                     | m   | <i>BBS1</i> c.1169T>G;p.(M390R)                                                   | <i>BBS1</i> c.1169T>G;p.(M390R)                                                   | <i>PDE6B</i> c.1375G>A;p.(D459N)                                                                          | -           |
| BBS10-I                   | f   | <i>BBS1</i> c.1169T>G;p.(M390R)                                                   | <i>BBS1</i> c.1169T>G;p.(M390R)                                                   |                                                                                                           | yes         |
| BBS10-II                  | f   | <i>BBS1</i> c.1169T>G;p.(M390R)                                                   | <i>BBS1</i> c.1169T>G;p.(M390R)                                                   |                                                                                                           | yes         |
| BBS66                     | f   | <i>BBS1</i> c.1169T>G;p.(M390R)                                                   | <i>BBS1</i> c.1169T>G;p.(M390R)                                                   | <i>ABCA4</i> c.2588G>C;p.(G863A)                                                                          | -           |
| BBS18                     | m   | <i>BBS1</i> c.436C>T;p.R146*                                                      | <i>BBS1</i> c.1169T>G;p.(M390R)                                                   |                                                                                                           | -           |
| BBS80                     | m   | <i>BBS1</i> c.890G>A;p.R297Q                                                      | <i>BBS1</i> c.1169T>G;p.(M390R)                                                   |                                                                                                           | -           |
| ARRP328                   | f   | <i>BBS1</i> c.1169T>G;p.(M390R)                                                   | <i>BBS1</i> c.1232_1235delGAGG; p.(G411Efs*12)                                    |                                                                                                           | -           |
| BBS87                     | f   | <i>BBS1</i> c.1169T>G;p.(M390R)                                                   | <i>BBS1</i> c.1232_1235delGAGG; p.(G411Efs*12)                                    |                                                                                                           | -           |
| BBS64                     | m   | <i>BBS1</i> c.479G>A;p.(R160Q)                                                    | <i>BBS1</i> c.479G>A;p.(R160Q)                                                    | <i>RIMS1</i> c.3208G>A;p.(A1070T)<br><i>GNAT2</i> c.427G>A;p.(A143T)<br><i>ABCA4</i> c.3608G>A;p.(G1203Q) | yes         |
| BBS78                     | m   | <i>BBS1</i> c.479+4A>G;p.(?)                                                      | <i>BBS1</i> Deletion Exons 14-17                                                  |                                                                                                           | yes         |
| BBS54                     | m   | <i>BBS1</i> c.1570_1572delAAC; p.(N524del)                                        | <i>BBS1</i> c.1570_1572delAAC; p.(N524del)                                        |                                                                                                           | -           |
| BBS77                     | m   | <i>BBS1</i> c.784_793dup; p.(N269Gfs*95)                                          | <i>BBS1</i> c.1431_1447del; p.(L478Rfs*17)                                        |                                                                                                           | yes         |
| <b>BBS2: 3 patients</b>   |     |                                                                                   |                                                                                   |                                                                                                           |             |
| BBS53                     | f   | <i>BBS2</i> c.943C>T;p.(R315W)                                                    | <i>BBS2</i> c.943C>T;p.(R315W)                                                    |                                                                                                           | -           |
| BBS35                     | m   | <i>BBS2</i> c.661del;p.(L221Ffs*25)                                               | <i>BBS2</i> c.1895G>C;p.(R632P)                                                   |                                                                                                           | -           |
| ARRP379                   | m   | <i>BBS2</i> c.413T>G;p.(I138S)                                                    | <i>BBS2</i> c.413T>G;p.(I138S)                                                    |                                                                                                           | -           |
| <b>BBS3: 3 patients</b>   |     |                                                                                   |                                                                                   |                                                                                                           |             |
| BBS44-I                   | f   | <i>ARL6</i> (BBS3) c.291T>A;p.(S97R)                                              | <i>ARL6</i> (BBS3) c.528G>T; p.(W176C)                                            |                                                                                                           | yes         |
| BBS44-II                  | f   | <i>ARL6</i> (BBS3) c.291T>A;p.(S97R)                                              | <i>ARL6</i> (BBS3) c.528G>T; p.(W176C)                                            |                                                                                                           | yes         |
| BBS61                     | m   | <i>ARL6</i> (BBS3) Deletion Exons 4-9                                             | <i>ARL6</i> (BBS3) Deletion Exons 4-9                                             |                                                                                                           | -           |
| <b>BBS4: 3 patients</b>   |     |                                                                                   |                                                                                   |                                                                                                           |             |
| BBS37                     | m   | <i>BBS4</i> c.322G>A;p.(A108T)                                                    | <i>BBS4</i> c.514dupA; p.(I172Nfs*18)                                             |                                                                                                           | -           |
| BBS45                     | m   | <i>BBS4</i> c.1103A>G;p.(D368G)                                                   | <i>BBS4</i> c.1103A>G;p.(D368G)                                                   |                                                                                                           | -           |
| BBS55                     | m   | <i>BBS4</i> c.157-3c>G;p.(?)                                                      | <i>BBS4</i> c.157-3c>G;p.(?)                                                      |                                                                                                           | -           |
| <b>BBS5: 3 patients</b>   |     |                                                                                   |                                                                                   |                                                                                                           |             |
| BBS56-I                   | m   | <i>BBS5</i> c.143-4_143-2ins400-500;p.(?)<br>g.(170343574_170343578) ins(400_500) | <i>BBS5</i> c.143-4_143-2ins400-500;p.(?)<br>g.(170343574_170343578) ins(400_500) | <i>BBS12</i> c.1139C>T;p.(T380I) hom                                                                      | yes         |
| BBS56-II                  | m   | <i>BBS5</i> c.143-4_143-2ins400-500;p.(?)<br>g.(170343574_170343578) ins(400_500) | <i>BBS5</i> c.143-4_143-2ins400-500;p.(?)<br>g.(170343574_170343578) ins(400_500) | <i>BBS12</i> c.1139C>T;p.(T380I) hom                                                                      | yes         |
| BBS43                     | f   | <i>BBS5</i> c.143-4_143-2ins400-500;p.(?)<br>g.(170343574_170343578) ins(400_500) | <i>BBS5</i> c.143-4_143-2ins400-500;p.(?)<br>g.(170343574_170343578) ins(400_500) |                                                                                                           | -           |
| <b>BBS6: 1 patient</b>    |     |                                                                                   |                                                                                   |                                                                                                           |             |
| BBS33                     | m   | <i>MKKS</i> (BBS6) c.110A>G; p.(Y37C)                                             | <i>MKKS</i> (BBS6) c.110A>G; p.(Y37)                                              |                                                                                                           | -           |
| <b>BBS7: 3 patients</b>   |     |                                                                                   |                                                                                   |                                                                                                           |             |
| BBS70                     | f   | <i>BBS7</i> c.712_715delAGAG; p.(R238Efs*59)                                      | <i>BBS7</i> c.968A>G;p.(H323R)                                                    |                                                                                                           | -           |
| BBS62                     | f   | <i>BBS7</i> c.968A>G;p.(H323R)                                                    | <i>BBS7</i> c.968A>G;p.(H323R)                                                    |                                                                                                           | -           |
| BBS60                     | m   | <i>BBS7</i> c.712_715delAGAG; p.(R238Efs*59)                                      | <i>BBS7</i> c.1037+29T>A;p.(?)                                                    |                                                                                                           | yes         |
| <b>BBS8: 1 patient</b>    |     |                                                                                   |                                                                                   |                                                                                                           |             |
| BBS67                     | m   | <i>TTC8</i> (BBS8) c.694G>A; p.(G232R)                                            | <i>TTC8</i> (BBS8) c.694G>A; p.(G232R)                                            |                                                                                                           | -           |
| <b>BBS9: 5 patients</b>   |     |                                                                                   |                                                                                   |                                                                                                           |             |
| BBS40                     | m   | <i>BBS9</i> c.263+1G>T;p.(?)                                                      | <i>BBS9</i> c.263+1G>T;p.(?)                                                      |                                                                                                           | -           |
| BBS42-I                   | m   | <i>BBS9</i> Deletion Exon 16                                                      | <i>BBS9</i> Deletion Exon 16                                                      | <i>SDCCAG8</i> (BBS16) c.237T>A;p.(D79E)                                                                  | yes         |
| BBS42-II                  | m   | <i>BBS9</i> Deletion Exon 16                                                      | <i>BBS9</i> Deletion Exon 16                                                      |                                                                                                           | yes         |
| LCA70                     | f   | <i>BBS9</i> c.1693+1G>A;p.(?)                                                     | <i>BBS9</i> c.1693+1G>A;p.(?)                                                     |                                                                                                           | yes         |
| BBS74                     | f   | <i>BBS9</i> Deletion Exons 7-8                                                    | <i>BBS9</i> Deletion Exons 7-8                                                    |                                                                                                           | yes         |
| <b>BBS10: 20 patients</b> |     |                                                                                   |                                                                                   |                                                                                                           |             |
| BBS81                     | m   | <i>BBS10</i> c.271dup;p.(C91Lfs*5)                                                | <i>BBS10</i> c.271dup;p.(C91Lfs*5)                                                |                                                                                                           | -           |
| BBS48                     | m   | <i>BBS10</i> c.271dup;p.(C91Lfs*5)                                                | <i>BBS10</i> c.271dup;p.(C91Lfs*5)                                                | <i>MKKS</i> (BBS6) c.1363G>A;p.(E455K)                                                                    | -           |
| BBS46                     | f   | <i>BBS10</i> c.271dup;p.(C91Lfs*5)                                                | <i>BBS10</i> c.271dup;p.(C91Lfs*5)                                                | <i>SDCCAG8</i> (BBS16) c.1337G>A;p.(R446Q)                                                                | -           |

|                   |   |                                                    |                                               |                                                                        |     |
|-------------------|---|----------------------------------------------------|-----------------------------------------------|------------------------------------------------------------------------|-----|
| BBS16             | m | <i>BBS10</i> c.271dup;p.(C91Lfs*5)                 | <i>BBS10</i> c.271dup;p.(C91Lfs*5)            |                                                                        | yes |
| BBS83             | f | <i>BBS10</i> c.271dup;p.(C91Lfs*5)                 | <i>BBS10</i> c.273C>G;p.(C91W)                |                                                                        | yes |
| BBS84             | f | <i>BBS10</i> c.271dup;p.(C91Lfs*5)                 | <i>BBS10</i> c.271dup;p.(C91Lfs*5)            |                                                                        | -   |
| BBS13             | m | <i>BBS10</i> c.271dup;p.(C91Lfs*5)                 | <i>BBS10</i> c.271dup;p.(C91Lfs*5)            |                                                                        | -   |
| BBS85             | f | <i>BBS10</i> c.271dup;p.(C91Lfs*5)                 | <i>BBS10</i> c.271dup;p.(C91Lfs*5)            |                                                                        | -   |
| BBS75             | f | <i>BBS10</i> c.271dup;p.(C91Lfs*5)                 | <i>BBS10</i> c.530A>G;p.(Y177C)               | <i>CEP164</i> c.4174C>T;p.(R1392W)<br><i>IFT122</i> c.668C>T;p.(P223L) | -   |
| BBS15             | m | <i>BBS10</i> c.271dup;p.(C91Lfs*5)                 | <i>BBS10</i> c.271dup;p.(C91Lfs*5)            |                                                                        | -   |
| BBS76             | m | <i>BBS10</i> c.271dup;p.(C91Lfs*5)                 | <i>BBS10</i> c.235dupA;<br>p.(T79Nfs*17)      |                                                                        | -   |
| BBS82             | m | <i>BBS10</i> c.145C>T;p.(R49W)                     | <i>BBS10</i> c.271dup;p.(C91Lfs*5)            |                                                                        | -   |
| BBS72             | f | <i>BBS10</i> c.145C>T;p.(R49W)                     | <i>BBS10</i> c.145C>T;p.(R49W)                |                                                                        | -   |
| SRP95             | m | <i>BBS10</i> c.145C>T;p.(R49W)                     | <i>BBS10</i> c.145C>T;p.(R49W)                |                                                                        | yes |
| BBS50             | m | <i>BBS10</i> c.578>C;p.(L193S)                     | <i>BBS10</i> c.578>C;p.(L193S)                |                                                                        | yes |
| BBS71             | f | <i>BBS10</i> c.686C>T;p.(P229L)                    | <i>BBS10</i> c.271dup;p.(C91Lfs*5)            |                                                                        | yes |
| BBS86             | f | <i>BBS10</i><br>c.858_859dup;p.(Q287Lfs*1)2        | <i>BBS10</i> c.901C>T;p.(L301V)               |                                                                        | -   |
| BBS47             | m | <i>BBS10</i> c.931T>G;p.(S311A)                    | <i>BBS10</i> c.931T>G;p.(S311A)               |                                                                        | yes |
| BBS57             | f | <i>BBS10</i> c.1603_1606delGATT;<br>p.(D535Lfs*20) | <i>BBS10</i> c.1250C>T;p.(A417V)              |                                                                        | -   |
| RCD768            | m | <i>BBS10</i> c.1802C>T;p.(P601L)                   | <i>BBS10</i> c.1802C>T;p.(P601L)              |                                                                        | -   |
| BBS12: 3 patients |   |                                                    |                                               |                                                                        |     |
| BBS59             | f | <i>BBS12</i><br>c.1115_1116del;p.(F372*)           | <i>BBS12</i> c.1237C>G;p.(L413V)              |                                                                        | -   |
| BBS58             | m | <i>BBS12</i> c.2023C>T;p.(R675*)                   | <i>BBS12</i> c.1504>T;p.(A502S)               |                                                                        | -   |
| BBS41             | f | <i>BBS12</i> c.898C>T;p.(Q300*)                    | <i>BBS12</i> c.1063C>T;p.(R355*)              | <i>BBS4</i> c.65G>A;p.(R22Q)                                           | -   |
| BBS16: 1 patient  |   |                                                    |                                               |                                                                        |     |
| SRP890            | m | <i>SDCCAG8</i> (BBS16)<br>c.740+356C>T; p.(?)      | <i>SDCCAG8</i> (BBS16)<br>c.740+356C>T; p.(?) |                                                                        | -   |

**Footnote:** <sup>1</sup>Genbank reference sequences: *ABCA4* NM\_000350.3, *BBS1* NM\_024649.5, *BBS2* NM\_031885.5, *ARL6* (BBS3) NM\_177976.3, *BBS4* NM\_033028.5, *BBS5* NM\_152384.3, *MKKS* (BBS6) NM\_018848.3, *BBS7* NM\_176824.3, *TTC8* (BBS8) NM\_198309.3, *BBS9* NM\_198428.3, *BBS10* NM\_024685.4, *BBS12* NM\_152618.3., *SDCCAG8* (BBS16) NM\_006642.5, *CEP164* NM\_014956.5, *GNAT2* NM\_005272.5, *IFT122* NM\_052985.4, *PDE6B* NM\_000283.4, *RIMS1* NM\_014989.5. Genomic position refers to GRCh37,hg19.

**Supplementary Table S2: Mutation spectrum in BBS-related genes in this study cohort**

| Gene & Variant <sup>1</sup>                                                                                                                         | Reference (PMID)                                         | Evidence <sup>2</sup>                      | Classification <sup>3</sup> | Splice prediction <sup>4</sup>                                                           | Allele count |
|-----------------------------------------------------------------------------------------------------------------------------------------------------|----------------------------------------------------------|--------------------------------------------|-----------------------------|------------------------------------------------------------------------------------------|--------------|
| <i>BBS1</i><br>c.436C>T;p.(R146*)                                                                                                                   | PMID:32531858 [78]<br>same patient                       | PVS1, PM2,<br>PP5<br>(ClinVar)             | pathogenic                  |                                                                                          | 1            |
| <i>BBS1</i><br>c.479G>A;p.(R160Q)                                                                                                                   | PMID:26261414 [79]                                       | PM2, PP3,<br>PP5<br>(ClinVar)              | likely<br>pathogenic        |                                                                                          | 2            |
| <i>BBS1</i><br>c.479+4A>G;p.(?)                                                                                                                     | this study                                               | PM2, PP3                                   | VUS                         | Splice AI: benign (low;0.85)<br>dbscSNV Ada: deleterious (1)<br>RF: deleterious (0.89)   | 1            |
| <i>BBS1</i><br>c.784_793dup;p.(N269Gfs*95)                                                                                                          | this study                                               | PVS1, PM2                                  | likely<br>pathogenic        |                                                                                          | 1            |
| <i>BBS1</i><br>c.890G>A;p.(R297Q)                                                                                                                   | PMID:25170860 [37]                                       | PM2, BP4                                   | VUS                         |                                                                                          | 1            |
| <i>BBS1</i><br>c.1169T>G;p.(M390R)                                                                                                                  | PMID:12118255 [80]                                       | PS4, PM2,<br>PP5<br>(ClinVar)              | pathogenic                  |                                                                                          | 18           |
| <i>BBS1</i><br>c.1232_1235delGAGG;<br>p.(G411Efs*12)                                                                                                | PMID:32531858 [78]<br>same patient                       | PM2, PP5<br>(ClinVar)                      | pathogenic                  |                                                                                          | 2            |
| <i>BBS1</i><br>c.1431_1447del;p.(L478Rfs*17)                                                                                                        | this study                                               | PVS1, PM2                                  | likely<br>pathogenic        |                                                                                          | 1            |
| <i>BBS1</i><br>c.1570_1572delAAC;<br>p.(N524del)                                                                                                    | PMID:21344540 [81]                                       | PM2, PM4                                   | VUS                         |                                                                                          | 2            |
| <i>BBS1</i><br>Deletion Exons 14-17                                                                                                                 | this study                                               | PVS1, PM2                                  | pathogenic                  |                                                                                          | 1            |
| <i>BBS2</i><br>c.413T>G;p.(I138S)                                                                                                                   | PMID:32531858 [78]<br>same patient                       | PM2, PP5<br>(ClinVar)                      | likely<br>pathogenic        |                                                                                          | 2            |
| <i>BBS2</i><br>c.661del;p.(L221Ffs*25)                                                                                                              | PMID:20120035 [82]                                       | PVS1, PM2,<br>PP5<br>(ClinVar)             | pathogenic                  |                                                                                          | 1            |
| <i>BBS2</i><br>c.943C>T;p.(R315W)                                                                                                                   | PMID:11567139 [34]                                       | PM2, PM1,<br>PM5, PP3,<br>PP5<br>(ClinVar) | pathogenic                  |                                                                                          | 2            |
| <i>BBS2</i><br>c.1895G>C;p.(R632P)                                                                                                                  | PMID:11567139 [34]                                       | PM2, PP3,<br>PP5<br>(ClinVar)              | likely<br>pathogenic        |                                                                                          | 1            |
| <i>ARL6</i> (BBS3)<br>c.291T>A;p.(S97R)                                                                                                             | PMID:32531858 [78]<br>same patient                       | PM2, PP2,<br>PP3, PP5<br>(ClinVar)         | VUS                         |                                                                                          | 2            |
| <i>ARL6</i> (BBS3)<br>c.528G>T;p.(W176C)                                                                                                            | PMID:32531858 [78]<br>same patient                       | PM2, PP2,<br>PP3, PP5<br>(ClinVar)         | VUS                         |                                                                                          | 2            |
| <i>ARL6</i> (BBS3)<br>Deletion Exons 4-9                                                                                                            | PMID:32531858 [78]<br>same patient                       | PVS1, PM2                                  | pathogenic                  |                                                                                          | 2            |
| <i>BBS4</i><br>c.157-3C>G;p.(?)                                                                                                                     | PMID:32531858 [78]<br>same patient                       | PM2, PP3,<br>PP5<br>(ClinVar)              | likely<br>pathogenic        | SpliceAI: benign (low;0.78)<br>dbscSNV Ada: deleterious (0.99)<br>RF: deleterious (0.89) | 2            |
| <i>BBS4</i><br>c.322G>A;p.(A108T)                                                                                                                   | PMID:23591405 [83]<br>same patient                       | PM2, PP5<br>(ClinVar)                      | likely<br>pathogenic        |                                                                                          | 1            |
| <i>BBS4</i><br>c.514dupA;p.(I172Nfs*18)                                                                                                             | PMID:23591405 [83]<br>same patient                       | PVS1, PM2                                  | likely<br>pathogenic        |                                                                                          | 1            |
| <i>BBS4</i><br>c.1103A>G;p.(D368G)                                                                                                                  | PMID:15666242 [84]                                       | PM2, PP3,<br>PP5<br>(ClinVar)              | VUS                         |                                                                                          | 2            |
| <i>BBS5</i><br>c.143-4_143-2ins440;p.(?)<br>Intronic insertion of 400-500 bp<br>GRCh37 (hg19) NC_000002:<br>g.(170343574_170343578)<br>ins(400_500) | PMID:32531858 [78]<br>same patient,<br>additional family | PVS1, PM2                                  | likely<br>pathogenic        | cannot be analyzed due to<br>missing sequence information of<br>the insertion            | 4            |
| <i>MKKS</i> (BBS6)<br>c.110A>G;p.(Y37C)                                                                                                             | PMID:10802661 [85]                                       | PM2, PP3,<br>PP5<br>(ClinVar)              | pathogenic                  |                                                                                          | 2            |
| <i>BBS7</i><br>c.712_715delAGAG;<br>p.(R238Efs*59)                                                                                                  | PMID:19402160 [86]                                       | PVS1, PM2,<br>PP5<br>(ClinVar)             | pathogenic                  |                                                                                          | 2            |

|                                                                                              |                                    |                                     |                      |                                                                                                                               |    |
|----------------------------------------------------------------------------------------------|------------------------------------|-------------------------------------|----------------------|-------------------------------------------------------------------------------------------------------------------------------|----|
| <i>BBS7</i><br>c.968A>G;p.(H323R)                                                            | PMID:12567324 [87]                 | PM2, PP5<br>(ClinVar)               | likely<br>pathogenic |                                                                                                                               | 3  |
| <i>BBS7</i><br>c.1037+29T>A;p.(?)                                                            | this study                         | BS1, BP7                            | likely benign        | Splice AI: no effect on splicing<br>predicted (0.0/0.04)                                                                      | 1  |
| <i>TTC8</i> (BBS8)<br>c.694G>A;p.(G232R)                                                     | this study                         | PM2, PP3                            | VUS                  |                                                                                                                               | 2  |
| <i>BBS9</i><br>c.263+1G>T;p.(?)                                                              | PMID:32531858<br>same patient      | PVS1, PM2                           | likely<br>pathogenic | SpliceAI: splice altering (1)<br>dbscSNV Ada: deleterious (1)<br>RF: deleterious (0.93)                                       | 2  |
| <i>BBS9</i><br>c.1693+1G>A;p.(?)                                                             | PMID:26766544 [88]<br>same patient | PVS1, PM2,<br>PP5<br>(ClinVar)      | pathogenic           | SpliceAI: splice altering (0.97)<br>dbscSNV Ada: deleterious (1)<br>RF: deleterious (0.94)                                    | 2  |
| <i>BBS9</i><br>Deletion Exons 7-8                                                            | this study                         | PVS1, PM2                           | pathogenic           |                                                                                                                               | 2  |
| <i>BBS9</i><br>Deletion Exon 16                                                              | PMID:32531858 [78]<br>same patient | PVS1, PM2                           | pathogenic           |                                                                                                                               | 4  |
| <i>BBS10</i><br>c.145C>T;p.(R49W)                                                            | PMID:16582908 [89]                 | PM2, PP5<br>(ClinVar)               | likely<br>pathogenic |                                                                                                                               | 5  |
| <i>BBS10</i><br>c.235dup;p.(T79Nfs*17)                                                       | PMID:28143435 [90]                 | PVS1, PM2,<br>PP5<br>(ClinVar)      | pathogenic           |                                                                                                                               | 1  |
| <i>BBS10</i><br>c.271dup;p.(C91Lfs*5)                                                        | PMID:16582908<br>[89]v             | PS4, PVS1,<br>PM2, PP5<br>(ClinVar) | pathogenic           |                                                                                                                               | 27 |
| <i>BBS10</i><br>c.273C>G;p.(C91W)                                                            | PMID:16582908 [89]                 | PM2, PP5<br>(ClinVar)               | likely<br>pathogenic |                                                                                                                               | 1  |
| <i>BBS10</i><br>c.530A>G;p.(Y177C)                                                           | PMID:19797195 [91]                 | PM2, PM1,<br>PP5<br>(ClinVar)       | likely<br>pathogenic |                                                                                                                               | 1  |
| <i>BBS10</i><br>c.578T>C;p.(L193S)                                                           | PMID:32531858 [78]<br>same patient | PM2, PP3,<br>PM1, PP5<br>(ClinVar)  | VUS                  |                                                                                                                               | 2  |
| <i>BBS10</i><br>c.686C>T;p.(P229L)                                                           | this study                         | PM2, PP5<br>(ClinVar)               | likely<br>pathogenic |                                                                                                                               | 1  |
| <i>BBS10</i><br>c.858_859dup;p.(Q287Lfs*12)                                                  | this study                         | PVS1, PM2,<br>PP5<br>(ClinVar)      | pathogenic           |                                                                                                                               | 1  |
| <i>BBS10</i><br>c.901C>T;p.(L301V)                                                           | this study                         | PM2, BP7                            | VUS                  |                                                                                                                               | 1  |
| <i>BBS10</i><br>c.931T>G;p.(S311A)                                                           | PMID:16582908 [89]                 | PM2, PM1,<br>PP5<br>(ClinVar)       | likely<br>pathogenic |                                                                                                                               | 2  |
| <i>BBS10</i><br>c.1250C>T;p.(A417V)                                                          | PMID:21052717 [92]                 | PM2, PP3,<br>PM1, PP5<br>(ClinVar)  | likely<br>pathogenic |                                                                                                                               | 1  |
| <i>BBS10</i><br>c.1603_1606del; p.(D535Lfs*20)                                               | PMID:32531858 [78]<br>same patient | PVS1, PM2,<br>PP5<br>(ClinVar)      | pathogenic           |                                                                                                                               | 1  |
| <i>BBS10</i><br>c.1802C>T;p.(P601L)                                                          | this study                         | PM2, PP3,<br>PM1                    | VUS                  |                                                                                                                               | 2  |
| <i>BBS12</i><br>c.898C>T;p.(Q300*)                                                           | PMID:23591405 [83]<br>same patient | PVS1, PM2,<br>PP5<br>(ClinVar)      | pathogenic           |                                                                                                                               | 1  |
| <i>BBS12</i><br>c.1063C>T;p.(R355*)                                                          | PMID:17160889 [93]                 | PVS1, PM2,<br>PP5<br>(ClinVar)      | pathogenic           |                                                                                                                               | 1  |
| <i>BBS12</i><br>c.1115_1116del;p.(F372*)                                                     | PMID:17160889 [93]                 | PVS1, PM2,<br>PP5<br>(ClinVar)      | pathogenic           |                                                                                                                               | 1  |
| <i>BBS12</i><br>c.1237C>G;p.(L413V)                                                          | PMID:32531858 [78]<br>same patient | PM2, PP5<br>(ClinVar)               | likely<br>pathogenic |                                                                                                                               | 1  |
| <i>BBS12</i><br>c.1504>T;p.(A502S)                                                           | PMID:32531858 [78]<br>same patient | PM2, PM1,<br>PP5<br>(ClinVar)       | likely<br>pathogenic |                                                                                                                               | 1  |
| <i>BBS12</i><br>c.2023C>T;p.(R675*)                                                          | PMID:20827784 [94]                 | PVS1, PM2,<br>PP5<br>(ClinVar)      | pathogenic           |                                                                                                                               | 1  |
| <i>SDCCAG8</i> (BBS16)<br>c.740+356C>T;p.(?)<br>GRCh37 (hg19)<br>NC_000001.10:g.243468435C>T | PMID:20835237 [95]                 | PM2, PP5<br>(ClinVar)               | likely<br>pathogenic | Splice AI: no effect on splicing<br>predicted (0.0/0.04), but<br>missplicing confirmed by RT-<br>PCR (PMID: <b>20835237</b> ) | 2  |

**Footnote:** <sup>1</sup>Genbank reference sequences: *BBS1* NM\_024649.5, *BBS2* NM\_031885.5, *ARL6* (BBS3) NM\_177976.3, *BBS4* NM\_033028.5, *BBS5* NM\_152384.3, *MKK5* (BBS6) NM\_018848.3, *BBS7* NM\_176824.3, *TTC8* (BBS8) NM\_198309.3, *BBS9* NM\_198428.3, *BBS10* NM\_024685.4, *BBS12* NM\_152618.3., *SDCCAG8* (BBS16) NM\_006642.5. Genomic position refers to GRCh37,hg19.

<sup>2,3</sup> Evidence and classification refers to the standards and guidelines provided by the American College of Medical Genetics and Genomics (ACMG) and the Association for Molecular Pathology to classify the identified variants [96] [1]. VUS - variant of uncertain significance; PVS1 - pathogenic very strong (Null variant in a gene where loss of function is a known mechanism of disease); PM1 - pathogenic moderate (Non-truncating non-synonymous variant is located in a mutational hot spot and/or critical and well-established functional domain); PM2 - pathogenic moderate (Extremely low frequency in gnomAD population databases); PM5 - pathogenic supporting (Different amino acid change as a known pathogenic variant); PP2 - pathogenic supporting (Missense variant in a gene with low rate of benign missense mutations and for which missense mutation is a common mechanism of a disease); PP3 - pathogenic supporting (For a missense or a splicing region variant, computational prediction tools unanimously support a deleterious effect on the gene); PP5 - pathogenic supporting (Reputable source recently reports variant as pathogenic, but the evidence is not available to the laboratory to perform an independent evaluation, e.g. ClinVar); PS4 - pathogenic strong (Typical case control studies with an OR; or, multiple unrelated probands with consistent phenotypes).

<sup>4</sup>SpliceAI uses deep neural networks to predict whether splicing events occur. The score can range from 0 to 1, when scores can be interpreted as the probability of the variant being splice-altering. dbSNV Ada predicts for SNVs within splicing consensus regions (-3 to +8 at the 5' splice site and -12 to +2 at the 3' splice site), their potential of altering splicing by using ensemble score computed using AdaBoost algorithm on the outputs of several other prediction tools. The score can range from 0 to 1, when higher values are more likely of being deleterious. RF predicts for SNVs within splicing consensus regions (-3 to +8 at the 5' splice site and -12 to +2 at the 3' splice site), their potential of altering splicing by using ensemble score computed using Random Forest algorithm on the outputs of several other prediction tools. The score can range from 0 to 1, when higher values are more likely of being deleterious.

**Supplementary Table S3:** Classification of additional heterozygous variants in BBS- or IRD-related genes.

| Gene & Variant <sup>1</sup>                | Reference (PMID)    | Evidence <sup>2</sup>   | Classification <sup>3</sup> | Splice prediction <sup>4</sup>                                                    |
|--------------------------------------------|---------------------|-------------------------|-----------------------------|-----------------------------------------------------------------------------------|
| <i>ABCA4</i> c.2588G>C;p.(G863A)           | PMID: 9054934 [97]  | PS4, PM2, PP3, PP2, PP5 | pathogenic                  | Revel Deleterious<br>dbscSNV Deleterious<br>Splice AI Splice-altering             |
| <i>ABCA4</i> c.3608G>A;p.(G1203Q)          | PMID: 15192030 [98] | PM2, PP2, PP5           | VUS                         | Revel Deleterious (Low)<br>dbscSNV Deleterious<br>Splice AI Splice-altering (Low) |
| <i>ABCA4</i> c.5338>G;p.(P1780A)           | PMID: 10746567 [99] | PP5, PM2, PM1, PP3, PP2 | pathogenic                  | Revel Deleterious<br>MetaLR Deleterious<br>Splice AI Benign                       |
| <i>BBS4</i> c.65G>A;p.(R22Q)               | this study          | PM2                     | VUS                         | no missplicing predicted                                                          |
| <i>BBS12</i> c.1139C>T;p.(T380I)           | this study          | Criteria unmet          | VUS                         | no missplicing predicted                                                          |
| <i>CEP164</i> c.4174C>T;p.(R1392W)         | this study          | PM2                     | VUS                         | no missplicing predicted                                                          |
| <i>GNAT2</i> c.427G>A;p.(A143T)            | this study          | PM2                     | VUS                         | Revel Deleterious (Low)<br>MetaLR Deleterious<br>Splice AI Benign                 |
| <i>IFT122</i> c.668C>T;p.(P223L)           | this study          | PM2                     | VUS                         | Revel Benign (Low)<br>MetaLR Deleterious<br>Splice AI Benign                      |
| <i>MKKS</i> (BBS6) c.1363G>A;p.(E455K)     | this study          | PM2                     | VUS                         | Revel Benign (Low)<br>MetaLR Deleterious (Low)<br>Splice AI Benign                |
| <i>MKKS</i> (BBS6) c.463C>T;p.(R155C)      | this study          | PM2                     | VUS                         | Revel Benign (Low)<br>MetaLR Deleterious (Low)<br>Splice AI Benign                |
| <i>PDE6B</i> c.1375G>A;p.(D459N)           | this study          | PM2                     | VUS                         | no missplicing predicted                                                          |
| <i>RIMS1</i> c.3208G>A;p.(A1070T)          | this study          | PM2                     | VUS                         | no missplicing predicted                                                          |
| <i>SDCCAG8</i> (BBS16) c.1337G>A;p.(R446Q) | this study          | PM2                     | VUS                         | no missplicing predicted                                                          |
| <i>SDCCAG8</i> (BBS16) c.237T>A;p.(D79E)   | this study          | PM2                     | VUS                         | no missplicing predicted                                                          |

**Footnote:** <sup>1</sup>Genbank reference sequences: *ABCA4* NM\_000350.3, *CEP164* NM\_014956.5, *GNAT2* NM\_005272.5, *IFT122* NM\_052985.4, *PDE6B* NM\_000283.4, *RIMS1* NM\_014989.5, *BBS4* NM\_033028.5, *MKKS* (BBS6) NM\_018848.3, *BBS12* NM\_152618.3., *SDCCAG8* (BBS16) NM\_006642.5.

<sup>2,3</sup> Evidence and classification refers to the standards and guidelines provided by the American College of Medical Genetics and Genomics (ACMG) and the Association for Molecular Pathology to classify the identified variants [96]. VUS - variant of uncertain significance; PM1 - pathogenic moderate (Non-truncating non-synonymous variant is located in a mutational hot spot and/or critical and well-established functional domain); PM2 - pathogenic moderate (Extremely low frequency in gnomAD population databases); PP2 - pathogenic supporting (Missense variant in a gene with low rate of benign missense mutations and for which missense mutation is a common mechanism of a disease); PP3 - pathogenic supporting (For a missense or a splicing region variant, computational prediction tools unanimously support a deleterious effect on the gene); PP5 - pathogenic supporting (Reputable source recently reports variant as pathogenic, but the evidence is not available to the laboratory to perform an independent evaluation, e.g. ClinVar); PS4 - pathogenic strong (Typical case control studies with an OR; or, multiple unrelated probands with consistent phenotypes).

<sup>4</sup>SpliceAI uses deep neural networks to predict whether splicing events occur. The score can range from 0 to 1, when scores can be interpreted as the probability of the variant being splice-altering. dbcsSNV Ada predicts for SNVs within splicing consensus regions (−3 to +8 at the 5' splice site and −12 to +2 at the 3' splice site), their potential of altering splicing by using ensemble score computed using AdaBoost algorithm on the outputs of several other prediction tools. The score can range from 0 to 1, when higher values are more likely of being deleterious. RF predicts for SNVs within splicing consensus regions (−3 to +8 at the 5' splice site and −12 to +2 at the 3' splice site), their potential of altering splicing by using ensemble score computed using Random Forest algorithm on the outputs of several other prediction tools. The score can range from 0 to 1, when higher values are more likely of being deleterious.
