# Supplementary material for: Ophthalmic and Genetic Features of Bardet Biedl Syndrome in a German Cohort
Source: MDPI journal article supplement (doi:10.3390/genes13071218), 2022-07-08
Supplement: s1 [file s1]

| Patient ID         | Polydactyly               | Brachydactyly   | Obesity           | Hypogonadism  | Hirschspurg | Liver: malformations -fibrosis | Kidney dysfunction                             | Diabetes                       | Hypertention | Heart                    | Neurology/Ataxia      | Hearing disturbances  | Speech difficulties | Anosomy | Development delay | Mental retardation | Behavioral problems | Asthma                 | Gout | Neurodermits | Metformin 500 mg daily | Vit D deficiency | Thyroid dysfunction |
|--------------------|---------------------------|-----------------|-------------------|---------------|-------------|--------------------------------|------------------------------------------------|--------------------------------|--------------|--------------------------|-----------------------|-----------------------|---------------------|---------|-------------------|--------------------|---------------------|------------------------|------|--------------|------------------------|------------------|---------------------|
| B851: 15 patients  |                           |                 |                   |               |             |                                |                                                |                                |              |                          |                       |                       |                     |         |                   |                    |                     |                        |      |              |                        |                  |                     |
| B8579              | 1 foot                    | no              | no                | unknown       | no          | no                             | yes                                            | no                             | no           | no                       | migraine              | no                    | yes until age 6     | no      | yes               | yes                | no                  | no                     | no   | no           | no                     | no               | no                  |
| B8549              | yes, 2 hands              | yes             | no                | unknown       | no          | no                             | no                                             | no                             | no           | no                       | no                    | no                    | no                  | no      | no                | no                 | no                  | no                     | no   | no           | no                     | no               | hypofunction        |
| B8530              | 2 hands and 2 feet        | yes             | yes               | unknown       | no          | no                             | no                                             | no                             | yes          | no                       | no                    | no                    | no                  | no      | no                | no                 | no                  | yes                    | no   | no           | no                     | no               | no                  |
| SRP17              | no                        | syndactyly      | yes               | unknown       | yes         | no                             | no                                             | no                             | yes          | no                       | migraine              | no                    | no                  | no      | no                | yes                | no                  | no                     | no   | no           | no                     | no               | no                  |
| B8510-I            | left hand and left foot   | no              | yes, until age 13 | unknown       | no          | no                             | no                                             | no                             | no           | no                       | no                    | no                    | no                  | no      | no                | no                 | no                  | no                     | no   | no           | no                     | no               | no                  |
| B8510-II           | 2 hands                   | yes             | yes               | unknown       | no          | no                             | no                                             | no                             | no           | no                       | no                    | no                    | yes until age 5     | no      | yes               | no                 | no                  | no                     | no   | no           | yes                    | no               | hypofunction        |
| B8566              | 1 hand                    | yes             | yes               | no            | yes         | no                             | cystitis                                       | yes at age 32, type 2          | no           | no                       | no                    | no                    | yes                 | no      | no                | yes                | no                  | no                     | no   | no           | yes                    | no               | no                  |
| B8518              | left hand and right foot  | yes             | yes               | unknown       | no          | no                             | yes                                            | no                             | yes          | thrombosis in lung, once | no                    | no                    | yes                 | no      | no                | no                 | no                  | no                     | no   | no           | no                     | yes              | no                  |
| B8580              | 2 hands                   | yes             | yes               | unknown       | no          | no                             | no                                             | no                             | no           | no                       | no                    | no                    | no                  | no      | no                | no                 | no                  | no                     | no   | no           | no                     | no               | no                  |
| ARRP328            | no                        | no              | no                | yes           | unknown     | no                             | no                                             | yes at age 36                  | yes          | no                       | no                    | no                    | no                  | no      | no                | no                 | no                  | no                     | no   | no           | yes                    | no               | hypofunction        |
| B8587              | 1 foot                    | no              | yes               | unknown       | no          | no                             | no                                             | no                             | no           | no                       | no                    | no                    | no                  | no      | yes               | no                 | no                  | no                     | no   | no           | yes                    | no               | hypofunction        |
| B8564              | no                        | yes             | yes               | unknown       | no          | fat                            | no                                             | yes                            | no           | no                       | no                    | no                    | no                  | no      | no                | no                 | no                  | no                     | no   | no           | yes                    | no               | hypofunction        |
| B8578              | 2 hands and 2 feet        | yes             | yes               | no            | no          | no                             | no                                             | no                             | yes          | no                       | no                    | no                    | no                  | no      | no                | no                 | no                  | no                     | no   | no           | no                     | no               | no                  |
| B8554              | right foot                | yes             | yes               | unknown       | yes         | yes                            | yes                                            | no                             | yes          | no                       | no                    | no                    | no                  | no      | yes               | no                 | no                  | no                     | no   | no           | yes                    | yes              | no                  |
| B8577              | 2 feet                    | yes             | yes               | no            | no          | no                             | no                                             | no                             | no           | no                       | no                    | no                    | no                  | no      | yes               | yes                | no                  | no                     | no   | no           | no                     | yes              | no                  |
| B852: 3 patients   |                           |                 |                   |               |             |                                |                                                |                                |              |                          |                       |                       |                     |         |                   |                    |                     |                        |      |              |                        |                  |                     |
| B8553              | two feet                  | yes             | yes               | unknown       | no          | no                             | no                                             | no                             | no           | no                       | no                    | no                    | no                  | no      | no                | no                 | no                  | no                     | no   | no           | no                     | no               | no                  |
| B8535              | yes, two feet             | no              | yes               | no            | no          | no                             | small kidney                                   | no                             | no           | no                       | no                    | no                    | yes, until age 13   | no      | no                | no                 | no                  | no                     | no   | no           | no                     | yes              | no                  |
| ARRP379            | no                        | no              | no                | yes           | no          | no                             | no                                             | no                             | no           | no                       | no                    | no                    | yes, until age 4    | yes     | no                | no                 | no                  | no                     | no   | yes          | no                     | no               | no                  |
| B853: 3 patients   |                           |                 |                   |               |             |                                |                                                |                                |              |                          |                       |                       |                     |         |                   |                    |                     |                        |      |              |                        |                  |                     |
| B8544-I            | two feet                  | no              | no                | unknown       | no          | no                             | no                                             | no                             | no           | no                       | no                    | no                    | no                  | no      | no                | no                 | no                  | no                     | no   | no           | no                     | no               | no                  |
| B8544-II           | two feet                  | no              | no                | unknown       | no          | no                             | no                                             | no                             | no           | no                       | no                    | no                    | no                  | no      | no                | no                 | no                  | no                     | no   | no           | no                     | no               | no                  |
| B8561              | 2 hands and 2 feet        | yes             | yes               | yes           | no          | no                             | no                                             | yes, insulin pump since age 10 | no           | no                       | no                    | no                    | no                  | no      | yes               | no                 | no                  | no                     | no   | no           | no                     | no               | no                  |
| B854: 3 patients   |                           |                 |                   |               |             |                                |                                                |                                |              |                          |                       |                       |                     |         |                   |                    |                     |                        |      |              |                        |                  |                     |
| B8537              | no                        | no              | no                | unknown       | no          | no                             | no                                             | no                             | no           | no                       | no                    | no                    | no                  | no      | no                | no                 | no                  | no                     | no   | no           | no                     | no               | no                  |
| B8545              | 2 hands and 2 feet        | yes             | yes               | unknown       | no          | no                             | no                                             | no                             | no           | no                       | no                    | no                    | no                  | no      | no                | no                 | no                  | no                     | no   | no           | no                     | no               | no                  |
| B8555              | 2 feet and left hand      | syndactyly      | yes, since age 5  | yes           | no          | no                             | no                                             | no                             | no           | no                       | no                    | no                    | yes, until age 5    | no      | yes               | yes                | no                  | yes                    | no   | no           | no                     | yes              | hypofunction        |
| B855: 3 patients   |                           |                 |                   |               |             |                                |                                                |                                |              |                          |                       |                       |                     |         |                   |                    |                     |                        |      |              |                        |                  |                     |
| B8556-I            | right hand                | no              | yes               | unknown       | no          | no                             | no                                             | no                             | no           | no                       | no                    | no                    | no                  | no      | yes               | yes                | no                  | yes, until age 4       | no   | no           | yes                    | yes              | yes                 |
| B8556-II           | two hands                 | no              | yes               | unknown       | no          | no                             | no                                             | no                             | no           | no                       | no                    | no                    | no                  | no      | no                | no                 | no                  | no                     | no   | no           | no                     | no               | no                  |
| B8543              | two feet                  | no              | yes               | no            | no          | no                             | no                                             | no                             | no           | no                       | no                    | no                    | no                  | no      | yes               | yes                | no                  | no                     | no   | no           | no                     | no               | no                  |
| B856: 1 patient    |                           |                 |                   |               |             |                                |                                                |                                |              |                          |                       |                       |                     |         |                   |                    |                     |                        |      |              |                        |                  |                     |
| B8533              | 2 hands and 2 feet        | yes             | no                | yes           | no          | no                             | yes                                            | no                             | yes          | no                       | no                    | no                    | no                  | no      | no                | no                 | no                  | no                     | no   | no           | no                     | no               | no                  |
| B857: 3 patients   |                           |                 |                   |               |             |                                |                                                |                                |              |                          |                       |                       |                     |         |                   |                    |                     |                        |      |              |                        |                  |                     |
| B8570              | 2 hands                   | no              | yes since 2005    | yes           | no          | no                             | no                                             | no                             | no           | no                       | no                    | no                    | no                  | no      | no                | no                 | no                  | no                     | no   | no           | no                     | no               | no                  |
| B8562              | 2 hands and 2 feet        | yes             | yes               | unknown       | no          | no                             | no                                             | no                             | no           | no                       | no                    | no                    | no                  | no      | yes               | no                 | no                  | no                     | no   | no           | yes                    | yes              | no                  |
| B8560              | 2 hands and 2 feet        | yes             | yes               | unknown       | no          | no                             | no                                             | no                             | no           | no                       | no                    | no                    | yes, until age 3    | no      | no                | no                 | yes                 | yes                    | no   | no           | no                     | no               | no                  |
| B858: 1 patient    |                           |                 |                   |               |             |                                |                                                |                                |              |                          |                       |                       |                     |         |                   |                    |                     |                        |      |              |                        |                  |                     |
| B8567              | 2 hands and 2 feet        | yes             | yes               | no            | no          | no                             | no                                             | no                             | no           | no                       | no, tympanostomy tube | no                    | no                  | no      | yes               | yes                | no                  | no                     | no   | no           | no                     | yes              | no                  |
| B859: 5 patients   |                           |                 |                   |               |             |                                |                                                |                                |              |                          |                       |                       |                     |         |                   |                    |                     |                        |      |              |                        |                  |                     |
| B8540-I            | 2 feet and left hand      | keratocornus RA | yes               | unknown       | no          | no                             | no                                             | no                             | no           | no                       | no                    | no                    | no                  | no      | yes               | yes                | no                  | yes                    | no   | no           | no                     | yes              | no                  |
| B8542-I            | right hand and left foot  | no              | yes               | unknown       | no          | no                             | yes                                            | no                             | yes          | no                       | no                    | no                    | no                  | no      | no                | yes                | no                  | yes, in childhood      | no   | no           | yes                    | no               | hypofunction        |
| B8542-II           | one foot                  | no              | yes               | unknown       | no          | no                             | no                                             | no                             | no           | no                       | no                    | no                    | no                  | no      | no                | no                 | no                  | yes, in childhood      | no   | no           | yes                    | no               | hypofunction        |
| LCA70              | 2 hands and 2 feet        | yes             | yes               | no            | no          | no                             | yes                                            | yes                            | yes          | no                       | no                    | no                    | no                  | no      | yes               | yes                | no                  | no                     | no   | no           | yes                    | ?                | no                  |
| B8574              | left foot                 | yes             | yes               | unknown       | no          | no                             | no                                             | no                             | no           | no                       | no                    | no                    | no                  | no      | yes               | yes                | no                  | no                     | no   | no           | no                     | no               | no                  |
| B8510: 20 patients |                           |                 |                   |               |             |                                |                                                |                                |              |                          |                       |                       |                     |         |                   |                    |                     |                        |      |              |                        |                  |                     |
| B8581              | 2 feet and left hand      | yes             | yes               | unknown       | no          | no                             | yes                                            | no                             | no           | no                       | no                    | no                    | yes                 | no      | yes               | no                 | no                  | no                     | no   | no           | yes                    | no               | no                  |
| B8548              | 2 feet                    | no              | yes               | unknown       | no          | no                             | no                                             | no                             | yes          | no                       | no                    | no                    | no                  | no      | no                | no                 | no                  | no                     | no   | no           | no                     | yes              | no                  |
| B8546              | right hand and right foot | no              | no                | yes           | no          | no                             | no                                             | no                             | yes          | no                       | no                    | no                    | no                  | no      | no                | no                 | yes                 | no                     | no   | no           | no                     | no               | no                  |
| B8516              | 2 hands and 2 feet        | yes             | yes               | unknown       | no          | no                             | yes                                            | no                             | no           | no                       | no                    | no                    | no                  | no      | yes               | no                 | no                  | no                     | no   | no           | no                     | no               | no                  |
| B8583              | 2 hands and 2 feet        | yes             | yes               | unknown       | no          | yes                            | no                                             | no                             | no           | no                       | no                    | no                    | no                  | no      | no                | no                 | no                  | no                     | no   | no           | yes                    | yes              | hypofunction        |
| B8584              | yes, 2 feet               | yes             | yes               | unknown       | no          | hypercholesterolemia           | small kidney                                   | no                             | no           | no                       | no                    | no                    | yes                 | no      | no                | no                 | yes                 | no                     | no   | no           | no                     | yes              | no                  |
| B8513              | yes                       | no              | yes               | unknown       | no          | no                             | yes                                            | no                             | no           | no                       | no                    | yes until 7 years old | no                  | no      | yes               | no                 | yes                 | no                     | no   | yes          | no                     | no               | no                  |
| B8585              | right foot                | yes             | yes               | cyst in ovary | no          | gall bladder removed           | suspected cysts                                | no                             | no           | no                       | no                    | no                    | yes                 | no      | yes               | yes                | no                  | no                     | no   | no           | no                     | ?                | ?                   |
| B8575              | right foot                | no              | yes               | no            | no          | no                             | polycystic kidney dysplasia without functional | no                             | no           | no                       | no                    | no                    | no                  | no      | no                | no                 | no                  | no                     | no   | no           | no                     | yes              | no                  |
| B8515              | 2 hands and 2 feet        | yes             | yes               | unknown       | no          | no                             | kidney transplant at age 12                    | no                             | no           | no                       | no                    | no                    | no                  | no      | no                | no                 | no                  | yes                    | no   | no           | no                     | no               | no                  |
| B8576              | 2 feet                    | yes             | yes               | no            | no          | no                             | no                                             | no                             | no           | no                       | no                    | no                    | no                  | no      | no                | no                 | no                  | no                     | no   | no           | no                     | yes              | no                  |
| B8582              | 2 hands and 2 feet        | yes             | yes               | unknown       | no          | no                             | yes                                            | no                             | yes          | no                       | no                    | no                    | yes, until age 4    | no      | no                | no                 | no                  | no                     | no   | yes          | yes                    | no               | no                  |
| B8572              | 2 hands and 2 feet        | yes             | yes               | no            | no          | no                             | no                                             | no                             | no           | no                       | no                    | no                    | no                  | no      | yes               | yes                | no                  | no                     | no   | no           | no                     | no               | no                  |
| SRP95              | one hand and 2 feet       | no              | yes               | unknown       | no          | no                             | yes (stones)                                   | no                             | no           | no                       | no                    | no                    | no                  | no      | no                | no                 | no                  | no                     | no   | no           | no                     | no               | no                  |
| B8550              | 2 hands and 2 feet        | yes             | no                | unknown       | no          | no                             | yes, stadium III                               | no                             | yes          | no                       | no                    | no                    | no                  | no      | no                | no                 | no                  | no                     | no   | no           | no                     | no               | no                  |
| B8571              | right foot                | no              | yes               | no            | no          | no                             | no                                             | no                             | no           | no                       | no                    | no                    | yes, until age 4    | no      | yes               | yes                | no                  | no                     | no   | yes          | no                     | no               | hypofunction        |
| B8586              | no                        | no              | yes               | no            | yes         | no                             | no                                             | no                             | no           | no                       | no                    | no                    | no                  | no      | yes               | yes                | no                  | no                     | no   | no           | no                     | no               | no                  |
| B8547              | 2 feet                    | no              | no                | unknown       | no          | no                             | no                                             | no                             | yes          | no                       | no                    | no                    | no                  | no      | no                | no                 | no                  | no                     | no   | no           | no                     | no               | no                  |
| B8557              | 2 hands and 2 feet        | yes             | yes since age 1   | unknown       | no          | no                             | no                                             | no                             | no           | no                       | no                    | no                    | yes, until age 6    | no      | no                | no                 | no                  | no                     | no   | no           | no                     | no               | no                  |
| RCD768             | left hand and left foot   | no              | no                | no            | no          | no                             | no                                             | no                             | no           | no                       | no                    | no                    | no                  | no      | no                | no                 | no                  | no                     | no   | no           | no                     | no               | no                  |
| B8512: 3 patients  |                           |                 |                   |               |             |                                |                                                |                                |              |                          |                       |                       |                     |         |                   |                    |                     |                        |      |              |                        |                  |                     |
| B8559              | right hand                | no              | no                | no            | no          | no                             | no                                             | no                             | no           | no                       | no                    | no                    | no                  | no      | no                | no                 | no                  | no                     | no   | no           | no                     | yes              | no                  |
| B8558              | 2 hands and 2 feet        | yes             | yes, since age 7  | unknown       | no          | no                             | no                                             | no                             | no           | no                       | no                    | no                    | no                  | no      | no                | no                 | no                  | no                     | no   | no           | no                     | no               | no                  |
| B8541              | no                        | no              | no                | yes           | yes         | no                             | no                                             | no                             | no           | no                       | no                    | no                    | no                  | no      | no                | no                 | no                  | obstructive bronchitis | no   | no           | no                     | no               | no                  |
| B8516: 1 patient   |                           |                 |                   |               |             |                                |                                                |                                |              |                          |                       |                       |                     |         |                   |                    |                     |                        |      |              |                        |                  |                     |
| SRP890             | no                        | no              | no                | no            | no          | liver hemangioma               | yes since 2001                                 | no                             | no           | no                       | no                    | no                    | yes, until age 5    | no      | no                | no                 | no                  | no                     | no   | no           | no                     | not known        | no                  |
